# Supplementary material for: Synthesis and electrochemical evaluation of Ti and V-based carbide MXene via microwave assisted hydrofluoric acid etching for energy storage
Source: Royal Society of Chemistry journal article supplement (doi:10.1039/d5nj00142k), 2025-01-01
Supplement: d5nj00142k1.pdf [file d5nj00142k1.pdf]

## Synthesis and Electrochemical Evaluation of Ti and V-based Carbide MXene via Microwave Assisted Hydrofluoric Acid Etching for Energy Storage

P. E. Lokhande<sup>1</sup>, Udayabhaskar Rednam<sup>1\*</sup>, Vishal Kadam<sup>2</sup>, Chaitali Jagtap<sup>2</sup>, S. R. Padalkar<sup>3</sup>, Rohini Bhat<sup>4\*</sup>, T. Boobalan<sup>4</sup>, Bandar Ali Al-Asbahi<sup>5</sup>

<sup>1</sup>Departamento de Mecánica, Facultad de Ingeniería, Universidad Tecnológica Metropolitana, Santiago, Chile

<sup>2</sup>Department of Physics, Savitribai Phule Pune University, Pune, 411007, India

<sup>3</sup>Department of Mechanical and Materials Engineering, University of Cincinnati, Ohio, 45220, USA.

<sup>4</sup>WestechPower Management Pvt. Ltd. Pune, India

<sup>5</sup>Department of Physics & Astronomy, College of Science, King Saud University, P.O. Box 2455, Riyadh 11451, Saudi Arabia

Corresponding Author: [p.eknath@utem.cl](mailto:p.eknath@utem.cl), [uday.rednam@utem.cl](mailto:uday.rednam@utem.cl)

### 1. Elemental Mapping

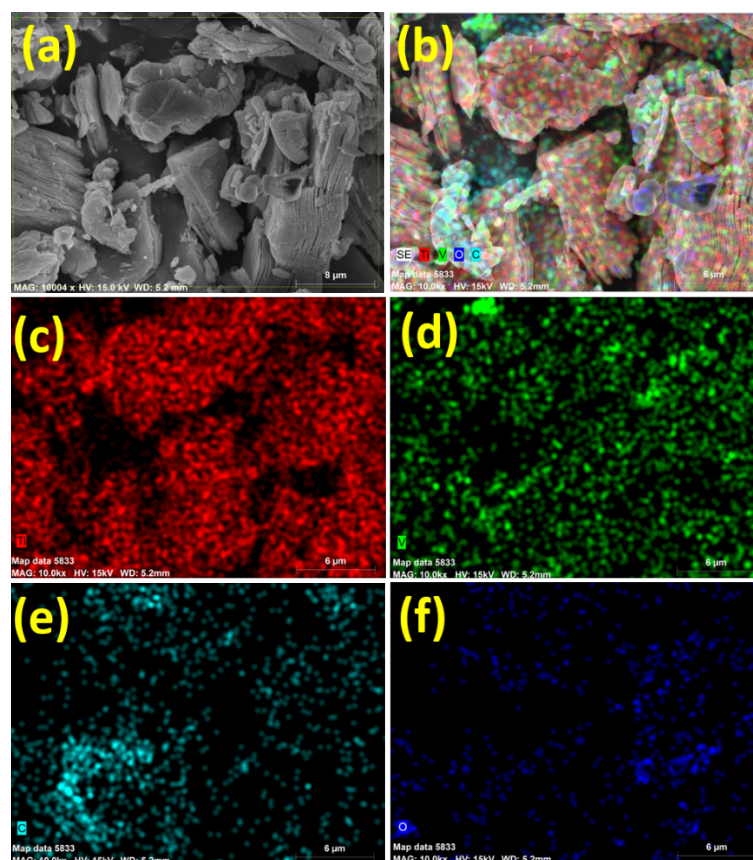

Fig. S1 EDS mapping of  $\text{Ti}_3\text{V}_2\text{C}_3\text{T}_x$  MXene

## 2. Kinetics of storage mechanism

The kinetics of the charge storage mechanism in the synthesized  $\text{Ti}_3\text{V}_2\text{C}_3\text{T}_x$  MXene material were evaluated using Dunn's model. The electrode's charge storage mechanism comprises a swift surface-controlled capacitive component and a slower diffusion-controlled distribution, analysed through the CV curve at different scan rates. The percentage of charge distribution can be calculated using the Randles-Sevcik equation, where ( $I_{\text{charge}} \propto v$ ) and ( $I_{\text{discharge}} \propto v$ ), which can be transformed into the following equation:

$$I(V) = K_1v + K_2v^{0.5} \quad (3)$$

$K_1$  and  $K_2$  are arbitrary constants that can be determined from the plot of  $v^{0.5}$  versus  $i(v)/v^{0.5}$ , as shown in **Fig. S2 (a)**, where the slope and Y-intercept yield the values of  $K_1$  and  $K_2$ , respectively. The charge storage distribution derived from equation (3) is depicted in **Fig. S2 (b)**, where the results clearly show that the diffusion-controlled process is predominant at low scan rate, accounting for 65% at  $1 \text{ mVs}^{-1}$  and decreasing to 16% at  $100 \text{ mVs}^{-1}$ . As scan rate increases the capacitive distribution dominance increased and reaches 84% at  $100 \text{ mVs}^{-1}$ . The charge distribution process is further depicted in **Fig. S2 (c-d)** for rates of 1 and  $100 \text{ mVs}^{-1}$ .

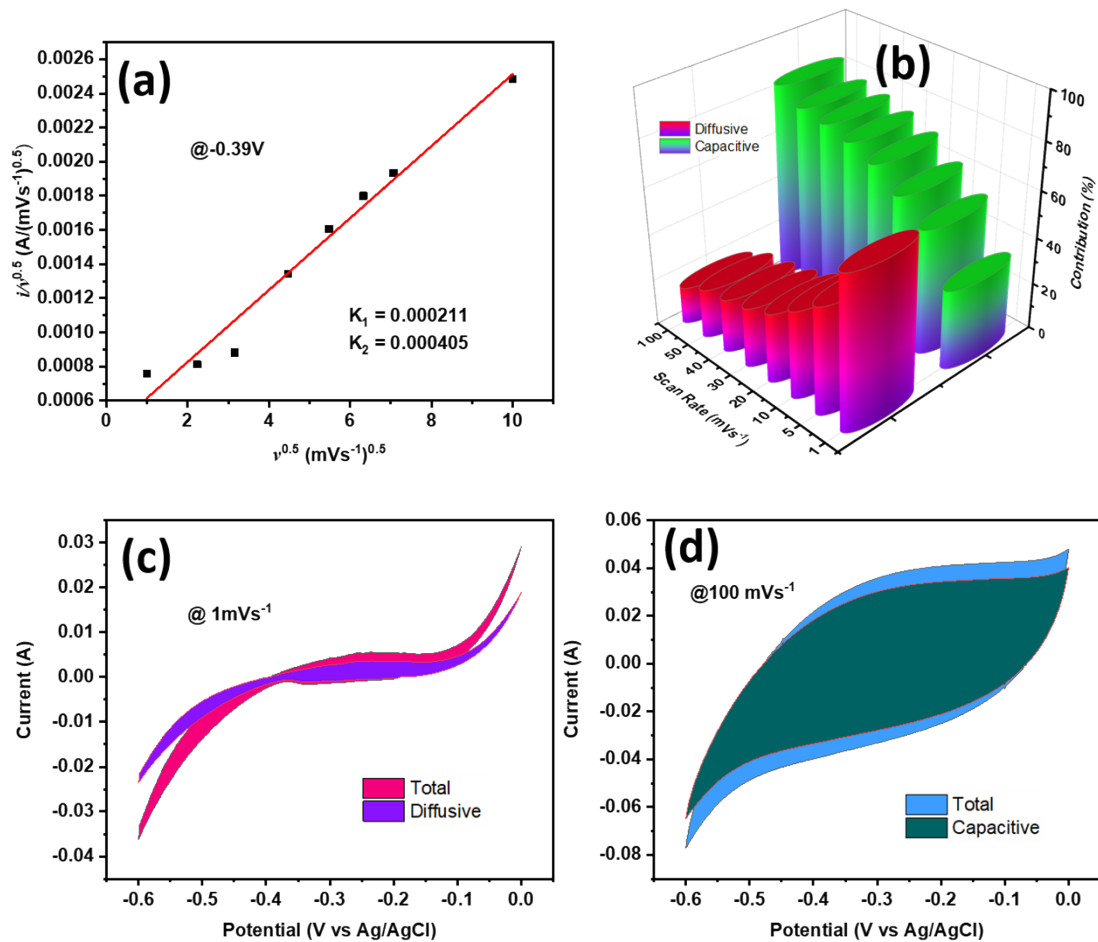

**Fig. S2**  $K_1$  and  $K_2$  values measured for distribution calculation (b) charge distribution at different scan rates (c) Diffusion distribution dominance at low scan rate  $1\text{ mVs}^{-1}$  (d) Capacitive distribution dominance at high scan rate  $100\text{ mVs}^{-1}$ .

**TEM analysis before and after cycling:**

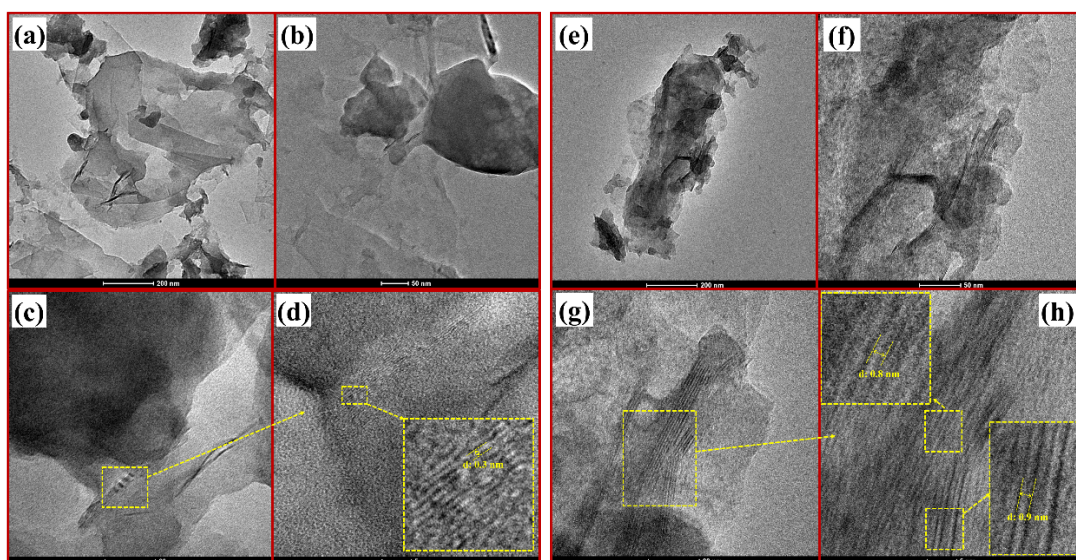

**Fig. S3 (a-b)** TEM images (c-d) HRTEM of  $\text{Ti}_3\text{V}_2\text{C}_3$  MXene before cycling (e-f) TEM images (c-d) HRTEM of  $\text{Ti}_3\text{V}_2\text{C}_3$  MXene after cycling.
